# Supplementary material
Source: publisher figshare collection journal article supplement (https://tandf.figshare.com/ndownloader/files/17991038)
Supplement: Supplementary file 1 [file 17991038]

**Supporting information**

**Table S1.** Drug like properties of new design thiazole urea derivatives.

| **New ID** | **HQSAR-IC50** | **HQSAR-MIC** | **BBB** | **MW (g/mol)** | **Rotatable bonds** | **H-bond acceptors** | **H-bond donors** | **XLOGP3** |
| --- | --- | --- | --- | --- | --- | --- | --- | --- |
| **Cpd51** | **8.93** | **6.63** | **0.02** | **473.55** | **11** | **7** | **2** | **1.39** |
| D001 | 8.27 | 6.20 | 0.03 | 453.56 | 9 | 6 | 4 | 2.77 |
| D002 | 8.38 | 6.21 | 0.05 | 481.61 | 10 | 6 | 4 | 3.57 |
| D003 | 8.16 | 6.15 | 0.03 | 454.55 | 9 | 7 | 4 | 1.90 |
| D004 | 8.14 | 6.13 | 0.03 | 466.60 | 9 | 6 | 3 | 3.91 |
| D005 | 8.14 | 6.11 | 0.03 | 452.57 | 9 | 6 | 3 | 3.58 |
| D006 | 8.17 | 6.11 | 0.03 | 453.56 | 9 | 7 | 4 | 1.65 |
| **D007** | **8.40** | **6.21** | **0.05** | **479.60** | **10** | **6** | **4** | **3.33** |
| D008 | 8.38 | 6.22 | 0.06 | 493.62 | 10 | 6 | 4 | 3.68 |
| D009 | 8.22 | 6.24 | 0.03 | 492.52 | 9 | 9 | 3 | 3.67 |
| D010 | 8.14 | 6.16 | 0.04 | 480.63 | 9 | 6 | 3 | 4.46 |
| D011 | 8.33 | 6.40 | 0.05 | 490.58 | 9 | 7 | 4 | 2.59 |
| D012 | 8.17 | 6.02 | 0.04 | 468.53 | 9 | 8 | 4 | 0.03 |
| D013 | 8.07 | 6.34 | 0.03 | 468.53 | 9 | 8 | 4 | 0.40 |
| D014 | 8.11 | 6.25 | 0.03 | 468.53 | 9 | 8 | 4 | 0.07 |
| D015 | 7.83 | 6.06 | 0.04 | 459.52 | 10 | 7 | 2 | 1.20 |
| D016 | 7.99 | 6.08 | 0.03 | 471.57 | 10 | 6 | 2 | 2.85 |
| D017 | 8.01 | 6.18 | 0.05 | 473.55 | 10 | 7 | 2 | 1.56 |
| D018 | 7.90 | 6.02 | 0.03 | 489.61 | 10 | 6 | 2 | 2.35 |
| D019 | 8.08 | 6.11 | 0.04 | 450.56 | 10 | 5 | 2 | 4.09 |
| D020 | 8.13 | 6.13 | 0.03 | 454.59 | 10 | 5 | 2 | 4.84 |
| D021 | 8.18 | 6.19 | 0.03 | 454.59 | 10 | 5 | 2 | 4.84 |
| D022 | 8.03 | 6.09 | 0.04 | 456.52 | 10 | 7 | 3 | 2.65 |
| D023 | 8.18 | 6.33 | 0.04 | 464.54 | 9 | 6 | 3 | 2.82 |
| D024 | 8.18 | 6.26 | 0.04 | 464.54 | 9 | 6 | 3 | 2.82 |
| D025 | 8.10 | 6.08 | 0.03 | 464.54 | 9 | 6 | 2 | 2.97 |
| D026 | 8.18 | 6.28 | 0.05 | 464.54 | 9 | 6 | 3 | 2.98 |
| D027 | 8.10 | 6.15 | 0.07 | 464.54 | 9 | 6 | 3 | 2.94 |
| D028 | 8.24 | 6.22 | 0.03 | 466.60 | 9 | 5 | 2 | 4.98 |
| D029 | 8.08 | 6.04 | 0.03 | 475.57 | 9 | 6 | 2 | 3.58 |
| D030 | 8.05 | 6.15 | 0.07 | 476.55 | 9 | 7 | 2 | 2.93 |
| D031 | 8.03 | 6.14 | 0.03 | 476.55 | 9 | 7 | 2 | 2.54 |
| D032 | 8.07 | 6.26 | 0.07 | 478.57 | 10 | 6 | 3 | 3.28 |
| D033 | 8.20 | 6.34 | 0.05 | 478.57 | 9 | 6 | 3 | 3.22 |
| D034 | 8.24 | 6.33 | 0.05 | 478.57 | 9 | 6 | 3 | 3.22 |
| D035 | 8.06 | 6.10 | 0.04 | 478.57 | 9 | 6 | 2 | 2.96 |
| D036 | 8.22 | 6.20 | 0.03 | 478.61 | 9 | 5 | 2 | 4.92 |
| D037 | 8.05 | 6.07 | 0.03 | 481.59 | 9 | 6 | 2 | 3.71 |
| D038 | 8.32 | 6.33 | 0.03 | 482.60 | 9 | 6 | 3 | 3.64 |
| D039 | 8.30 | 6.30 | 0.03 | 482.60 | 9 | 6 | 3 | 3.64 |
| D040 | 8.29 | 6.38 | 0.03 | 484.57 | 9 | 7 | 2 | 2.99 |
| D041 | 8.03 | 6.15 | 0.04 | 490.58 | 10 | 7 | 2 | 3.00 |
| D042 | 8.03 | 6.15 | 0.04 | 490.58 | 10 | 7 | 2 | 3.00 |
| D043 | 8.09 | 6.15 | 0.06 | 490.58 | 10 | 7 | 2 | 3.43 |
| D044 | 8.09 | 6.19 | 0.04 | 490.58 | 10 | 7 | 2 | 3.43 |
| D045 | 8.05 | 6.17 | 0.04 | 490.58 | 9 | 7 | 2 | 2.94 |
| D046 | 8.08 | 6.17 | 0.05 | 492.60 | 10 | 6 | 2 | 3.24 |
| D047 | 8.06 | 6.12 | 0.04 | 495.62 | 10 | 6 | 2 | 4.18 |
| D048 | 8.08 | 6.13 | 0.04 | 495.62 | 10 | 6 | 2 | 4.18 |
| D049 | 8.16 | 6.18 | 0.03 | 495.64 | 10 | 6 | 3 | 3.83 |
| D050 | 8.19 | 6.16 | 0.03 | 495.64 | 10 | 6 | 3 | 3.83 |
| D051 | 7.96 | 6.11 | 0.03 | 496.51 | 10 | 9 | 3 | 3.65 |
| D052 | 8.30 | 6.29 | 0.04 | 496.62 | 9 | 6 | 3 | 3.99 |
| D053 | 8.39 | 6.40 | 0.03 | 498.60 | 9 | 7 | 4 | 2.66 |
| D054 | 7.98 | 6.18 | 0.03 | 459.52 | 9 | 7 | 3 | 1.02 |
| D055 | 8.12 | 6.19 | 0.03 | 473.55 | 10 | 7 | 2 | 1.56 |
| D056 | 7.97 | 6.05 | 0.04 | 477.96 | 10 | 6 | 2 | 2.13 |
| D057 | 8.06 | 6.17 | 0.06 | 388.44 | 8 | 6 | 3 | 1.81 |
| D058 | 7.96 | 6.13 | 0.05 | 402.47 | 8 | 6 | 2 | 1.83 |
| D059 | 7.98 | 6.35 | 0.07 | 400.45 | 8 | 7 | 2 | 1.80 |
| D060 | 8.00 | 6.44 | 0.04 | 418.47 | 9 | 8 | 2 | 2.61 |
| D061 | 7.96 | 6.17 | 0.06 | 478.57 | 10 | 6 | 2 | 3.42 |
| D062 | 7.99 | 6.21 | 0.03 | 389.43 | 8 | 7 | 2 | 1.97 |
| **D063** | **8.01** | **6.51** | **0.04** | **432.50** | **9** | **8** | **2** | **2.93** |
| D064 | 7.99 | 6.39 | 0.04 | 404.44 | 8 | 8 | 2 | 2.17 |
| D065 | 7.95 | 6.11 | 0.03 | 428.51 | 8 | 6 | 3 | 2.47 |
| D066 | 8.06 | 6.27 | 0.05 | 388.44 | 8 | 6 | 3 | 1.85 |
| D067 | 8.04 | 6.16 | 0.03 | 477.56 | 9 | 8 | 3 | 2.08 |
| D068 | 7.95 | 6.03 | 0.04 | 414.48 | 8 | 6 | 3 | 2.10 |
| D069 | 8.00 | 6.06 | 0.03 | 476.57 | 9 | 7 | 2 | 2.76 |
| D070 | 7.93 | 6.20 | 0.04 | 448.52 | 9 | 7 | 3 | 1.80 |
| D071 | 7.88 | 6.04 | 0.03 | 447.53 | 9 | 6 | 3 | 2.44 |
| D072 | 7.91 | 6.17 | 0.04 | 448.52 | 9 | 7 | 3 | 1.80 |
| D073 | 8.00 | 6.05 | 0.03 | 447.53 | 9 | 6 | 3 | 2.41 |
| D074 | 8.17 | 6.45 | 0.04 | 389.43 | 8 | 7 | 3 | 1.30 |
| D075 | 8.06 | 6.11 | 0.03 | 433.46 | 8 | 7 | 3 | 1.66 |
| D076 | 7.99 | 6.14 | 0.03 | 415.47 | 8 | 6 | 3 | 1.81 |
| D077 | 7.98 | 6.09 | 0.04 | 415.47 | 8 | 6 | 3 | 1.35 |
| D078 | 7.96 | 6.06 | 0.04 | 465.47 | 9 | 8 | 2 | 2.49 |
| D079 | 7.91 | 6.06 | 0.05 | 429.49 | 8 | 6 | 2 | 1.54 |
| D080 | 7.98 | 6.15 | 0.03 | 429.49 | 8 | 6 | 3 | 1.73 |
| D081 | 7.94 | 6.10 | 0.03 | 479.50 | 9 | 8 | 2 | 2.86 |
| D082 | 8.10 | 6.19 | 0.09 | 437.51 | 8 | 5 | 3 | 3.65 |
| D083 | 7.86 | 6.12 | 0.03 | 400.45 | 8 | 7 | 2 | 1.44 |
| D084 | 7.98 | 6.15 | 0.03 | 452.53 | 8 | 6 | 2 | 3.17 |
| D085 | 7.99 | 6.28 | 0.04 | 389.43 | 8 | 7 | 2 | 1.97 |
| D086 | 7.91 | 6.19 | 0.05 | 400.45 | 8 | 7 | 2 | 1.41 |
| D087 | 8.10 | 6.00 | 0.07 | 429.49 | 9 | 7 | 2 | 2.75 |
| D088 | 8.02 | 6.17 | 0.04 | 498.60 | 9 | 7 | 3 | 1.66 |
| D089 | 7.95 | 6.07 | 0.04 | 445.49 | 9 | 7 | 3 | 1.50 |
| D090 | 8.03 | 6.14 | 0.03 | 487.57 | 10 | 7 | 3 | 1.47 |
| D091 | 8.01 | 6.11 | 0.03 | 473.55 | 10 | 7 | 3 | 1.29 |
| D092 | 7.99 | 6.08 | 0.03 | 459.52 | 10 | 7 | 3 | 0.85 |
| D093 | 7.97 | 6.09 | 0.04 | 458.53 | 10 | 7 | 3 | 0.60 |
| D094 | 7.53 | 6.06 | 0.05 | 498.58 | 9 | 7 | 2 | 2.63 |
| D095 | 7.76 | 6.22 | 0.05 | 481.52 | 9 | 7 | 2 | 2.49 |
| D096 | 7.66 | 6.19 | 0.05 | 492.55 | 9 | 7 | 2 | 2.36 |
| D097 | 7.98 | 6.22 | 0.07 | 498.60 | 10 | 7 | 2 | 2.16 |
| D098 | 7.96 | 6.09 | 0.06 | 495.55 | 10 | 7 | 2 | 2.13 |
| D099 | 8.05 | 6.15 | 0.06 | 485.56 | 9 | 7 | 2 | 2.04 |
| D100 | 7.81 | 6.17 | 0.04 | 492.55 | 9 | 7 | 2 | 2.03 |
| D101 | 7.81 | 6.14 | 0.05 | 492.55 | 9 | 7 | 2 | 2.03 |
| D102 | 7.94 | 6.15 | 0.04 | 459.52 | 10 | 7 | 2 | 1.95 |
| D103 | 8.09 | 6.17 | 0.06 | 499.58 | 10 | 7 | 2 | 1.94 |
| D104 | 8.08 | 6.18 | 0.06 | 499.58 | 9 | 7 | 2 | 1.94 |
| D105 | 7.96 | 6.06 | 0.04 | 461.51 | 10 | 7 | 2 | 1.88 |
| D106 | 7.93 | 6.06 | 0.04 | 485.56 | 9 | 7 | 2 | 1.75 |
| D107 | 7.94 | 6.13 | 0.06 | 472.56 | 10 | 7 | 2 | 1.67 |
| D108 | 7.94 | 6.12 | 0.04 | 445.49 | 9 | 7 | 2 | 1.58 |
| D109 | 7.93 | 6.07 | 0.06 | 459.52 | 10 | 7 | 2 | 1.49 |
| D110 | 7.93 | 6.10 | 0.05 | 454.50 | 9 | 7 | 2 | 1.32 |
| D111 | 7.95 | 6.08 | 0.05 | 468.53 | 10 | 7 | 2 | 1.23 |
| D112 | 7.99 | 6.14 | 0.04 | 497.61 | 9 | 6 | 2 | 3.35 |
| D113 | 7.58 | 6.01 | 0.04 | 497.59 | 9 | 6 | 2 | 3.28 |
| D114 | 7.95 | 6.07 | 0.05 | 471.57 | 10 | 6 | 2 | 2.87 |
| D115 | 7.99 | 6.09 | 0.04 | 471.57 | 10 | 6 | 2 | 2.86 |
| D116 | 7.99 | 6.13 | 0.04 | 483.58 | 9 | 6 | 2 | 2.81 |
| D117 | 8.03 | 6.11 | 0.04 | 471.57 | 9 | 6 | 2 | 2.52 |
| D118 | 7.99 | 6.12 | 0.04 | 469.56 | 9 | 6 | 2 | 2.45 |
| D119 | 7.95 | 6.07 | 0.05 | 457.55 | 10 | 6 | 2 | 2.43 |
| D120 | 7.99 | 6.08 | 0.04 | 457.55 | 9 | 6 | 2 | 2.34 |
| D121 | 7.96 | 6.09 | 0.05 | 469.56 | 10 | 6 | 2 | 2.28 |
| D122 | 7.90 | 6.06 | 0.04 | 455.53 | 10 | 6 | 2 | 2.18 |
| D123 | 8.00 | 6.10 | 0.04 | 455.53 | 9 | 6 | 2 | 2.09 |
| D124 | 7.77 | 6.06 | 0.04 | 441.50 | 9 | 6 | 2 | 2.03 |
| D125 | 7.94 | 6.07 | 0.05 | 443.52 | 9 | 6 | 2 | 1.90 |
| D126 | 7.92 | 6.09 | 0.04 | 453.51 | 9 | 6 | 2 | 1.65 |
| D127 | 8.05 | 6.12 | 0.03 | 473.55 | 10 | 7 | 3 | 1.29 |
| D128 | 7.89 | 6.10 | 0.04 | 430.48 | 8 | 6 | 3 | 0.79 |
| D129 | 8.17 | 6.17 | 0.05 | 471.53 | 9 | 7 | 2 | 1.23 |
| D130 | 7.90 | 6.05 | 0.04 | 449.91 | 8 | 6 | 2 | 2.16 |
| D131 | 7.90 | 6.07 | 0.04 | 469.56 | 10 | 6 | 2 | 2.41 |
| D132 | 7.94 | 6.05 | 0.05 | 447.48 | 9 | 7 | 2 | 1.98 |
| D133 | 7.78 | 6.09 | 0.04 | 457.50 | 9 | 7 | 2 | 1.32 |
| D134 | 8.04 | 6.13 | 0.03 | 485.60 | 10 | 6 | 2 | 3.05 |
| D135 | 8.06 | 6.18 | 0.04 | 484.57 | 9 | 6 | 2 | 2.26 |
| D136 | 8.01 | 6.16 | 0.06 | 499.58 | 10 | 7 | 2 | 1.78 |
| D137 | 7.88 | 6.09 | 0.06 | 461.56 | 9 | 6 | 2 | 1.98 |
| D138 | 7.91 | 6.08 | 0.04 | 483.58 | 10 | 6 | 2 | 3.04 |
| D139 | 7.96 | 6.07 | 0.04 | 491.58 | 10 | 7 | 2 | 0.73 |
| D140 | 7.91 | 6.10 | 0.04 | 493.58 | 9 | 6 | 2 | 2.71 |
| D141 | 7.97 | 6.17 | 0.03 | 498.60 | 10 | 7 | 3 | 1.66 |
| D142 | 7.91 | 6.10 | 0.03 | 495.59 | 10 | 6 | 2 | 3.14 |
| D143 | 7.85 | 6.18 | 0.05 | 498.58 | 9 | 7 | 2 | 2.46 |
| D144 | 7.75 | 6.18 | 0.05 | 494.57 | 9 | 6 | 2 | 2.17 |
| D145 | 7.95 | 6.08 | 0.03 | 467.54 | 10 | 6 | 2 | 2.11 |
| D146 | 7.99 | 6.15 | 0.03 | 470.54 | 10 | 6 | 3 | 1.86 |
| D147 | 7.91 | 6.10 | 0.04 | 481.57 | 9 | 6 | 2 | 2.60 |
| D148 | 7.98 | 6.08 | 0.06 | 473.55 | 10 | 7 | 2 | 1.92 |
| D149 | 8.07 | 6.16 | 0.07 | 499.58 | 9 | 7 | 2 | 2.40 |
| D150 | 7.93 | 6.10 | 0.04 | 483.54 | 9 | 7 | 3 | 0.91 |
| D151 | 8.09 | 6.27 | 0.06 | 498.60 | 9 | 7 | 2 | 2.23 |
| D152 | 8.15 | 6.18 | 0.05 | 499.58 | 9 | 7 | 2 | 1.94 |
| D153 | 7.92 | 6.12 | 0.04 | 458.53 | 10 | 7 | 3 | 1.76 |
| D154 | 7.91 | 6.09 | 0.03 | 497.57 | 10 | 7 | 3 | 1.38 |
| D155 | 7.95 | 6.08 | 0.03 | 481.57 | 10 | 6 | 2 | 2.63 |
| D156 | 7.76 | 6.09 | 0.03 | 455.53 | 9 | 6 | 2 | 2.40 |
| D157 | 7.99 | 6.14 | 0.04 | 498.60 | 10 | 7 | 3 | 1.50 |
| D158 | 8.07 | 6.21 | 0.04 | 485.56 | 10 | 7 | 3 | 1.23 |
| D159 | 7.93 | 6.06 | 0.04 | 473.52 | 10 | 7 | 2 | 2.07 |
| D160 | 7.81 | 6.18 | 0.06 | 497.59 | 9 | 6 | 2 | 2.78 |
| D161 | 7.70 | 6.07 | 0.04 | 475.54 | 10 | 7 | 2 | 2.32 |
| D162 | 7.95 | 6.08 | 0.06 | 495.55 | 10 | 7 | 2 | 2.10 |
| D163 | 7.95 | 6.12 | 0.05 | 458.53 | 9 | 6 | 2 | 1.77 |
| D164 | 8.00 | 6.13 | 0.06 | 494.57 | 10 | 7 | 2 | 1.57 |
| D165 | 7.92 | 6.10 | 0.06 | 494.57 | 10 | 6 | 2 | 2.00 |
| D166 | 7.98 | 6.09 | 0.06 | 475.58 | 10 | 6 | 2 | 1.83 |
| D167 | 7.95 | 6.07 | 0.05 | 461.56 | 9 | 6 | 2 | 1.92 |
| D168 | 7.94 | 6.19 | 0.05 | 473.55 | 10 | 7 | 2 | 2.38 |
| D169 | 7.91 | 6.06 | 0.05 | 457.50 | 10 | 7 | 2 | 1.07 |
| D170 | 7.77 | 6.23 | 0.05 | 495.55 | 9 | 7 | 2 | 2.89 |
| D171 | 7.98 | 6.15 | 0.06 | 496.58 | 10 | 7 | 2 | 2.69 |
| D172 | 8.07 | 6.20 | 0.05 | 498.60 | 9 | 7 | 2 | 1.77 |
| D173 | 7.89 | 6.09 | 0.06 | 475.58 | 10 | 6 | 2 | 2.34 |
| D174 | 8.03 | 6.17 | 0.04 | 470.54 | 9 | 6 | 2 | 1.90 |
| D175 | 8.12 | 6.25 | 0.03 | 499.58 | 9 | 7 | 3 | 1.83 |
| D176 | 7.99 | 6.10 | 0.04 | 493.53 | 10 | 8 | 2 | 2.58 |
| D177 | 7.96 | 6.05 | 0.04 | 463.94 | 9 | 6 | 2 | 2.23 |
| D178 | 8.02 | 6.13 | 0.05 | 483.58 | 9 | 6 | 2 | 2.92 |
| D179 | 7.99 | 6.12 | 0.04 | 483.58 | 10 | 6 | 2 | 2.72 |
| D180 | 7.89 | 6.04 | 0.04 | 494.36 | 8 | 6 | 2 | 2.32 |
| D181 | 7.98 | 6.10 | 0.07 | 496.58 | 10 | 7 | 2 | 2.16 |
| D182 | 8.03 | 6.12 | 0.05 | 471.53 | 10 | 7 | 2 | 1.23 |
| D183 | 8.07 | 6.19 | 0.03 | 498.60 | 9 | 6 | 2 | 2.61 |
| D184 | 8.00 | 6.11 | 0.04 | 469.56 | 9 | 6 | 2 | 2.53 |
| D185 | 7.87 | 6.24 | 0.05 | 495.55 | 9 | 7 | 2 | 2.56 |
| D186 | 7.82 | 6.24 | 0.05 | 480.54 | 9 | 6 | 3 | 2.22 |
| D187 | 8.02 | 6.12 | 0.03 | 491.51 | 9 | 8 | 2 | 2.41 |
| D188 | 7.95 | 6.11 | 0.05 | 468.53 | 9 | 7 | 2 | 1.73 |
| D189 | 7.72 | 6.23 | 0.05 | 498.58 | 9 | 7 | 2 | 2.46 |
| D190 | 7.92 | 6.09 | 0.04 | 467.54 | 9 | 6 | 2 | 2.16 |
| D191 | 7.90 | 6.07 | 0.04 | 469.56 | 10 | 6 | 2 | 2.80 |
| D192 | 7.92 | 6.07 | 0.03 | 469.51 | 8 | 7 | 3 | 1.18 |
| D193 | 7.92 | 6.10 | 0.04 | 496.58 | 9 | 7 | 2 | 1.90 |
| D194 | 7.92 | 6.10 | 0.05 | 491.58 | 10 | 7 | 2 | 1.29 |
| D195 | 8.07 | 6.16 | 0.03 | 470.54 | 9 | 7 | 3 | 0.95 |
| D196 | 7.76 | 6.24 | 0.05 | 495.55 | 9 | 7 | 2 | 2.86 |
| D197 | 8.00 | 6.14 | 0.05 | 482.56 | 9 | 7 | 2 | 1.91 |
| D198 | 7.98 | 6.09 | 0.06 | 483.58 | 10 | 6 | 2 | 2.68 |
| D199 | 7.96 | 6.13 | 0.05 | 486.59 | 10 | 7 | 3 | 1.21 |
| D200 | 7.96 | 6.11 | 0.05 | 483.58 | 10 | 6 | 2 | 2.72 |
